# Supplementary material
Source: publisher site journal article supplement (https://www.spandidos-publications.com/3010/downloadSupplementary)
Supplement: Supplementary file 1 [file downloadSupplementary]

## Sheet: ELISAs approved
Table SIII. ELISAs that have been approved by international agencies and their main technical features.
Kit name	Type	Target	Sensitivity	Specificity	Company/Supplier	Website	Time
WANTAI SARS-CoV-2 Ab ELISA	Sandwich ELISA	IgG/IgG for SARS-CoV-2 Spike protein	0.967	0.975	Beijing Wantai Biological Pharmacy Enterprise Co., Ltd.	http://www.ystwt.cn	~2 h
Platelia SARS-CoV-2 Total Ab	Indirect ELISA	IgM/IgG/IgA for SARS-CoV-2 nucleocapsid protein	0.98	0.993	Bio-Rad Laboratories, Inc	https://www.bio-rad.com/	~2.5 h
VIDAS SARS-CoV-2 IgG	ELFA	IgG for SARS-CoV-2 Spike protein	1	0.999	bioMérieux SA	https://www.biomerieux-diagnostics.com	27 min
VIDAS SARS-CoV-2 IgM	ELFA	IgM for SARS-CoV-2 Spike protein	1	0.994	bioMérieux SA	https://www.biomerieux-diagnostics.com	27 min
SARS-CoV-2 RBD IgG test	Indirect ELISA	IgG for SARS-CoV-2 Spike protein	1	0.964	Emory Medical Laboratories	https://www.emoryhealthcare.org	N/A
SARS-COV-2 ELISA (IgG)	Indirect ELISA	IgG for SARS-CoV-2 Spike protein	0.9	1	EUROIMMUN	https://www.euroimmun.it	~3 h
cPass SARS-CoV-2 Neutralization Antibody Detection Kit	blocking ELISA	Total neutralizing antibodies for SARS-CoV-2 Spike protein	1	1	GenScript USA Inc.	https://www.genscript.com	~1.5 h
SCoV-2 Detect IgG ELISA	Indirect ELISA	IgG for SARS-CoV-2 Spike protein	1	1	InBios	https://inbios.com	~2.5 h
SCoV-2 Detect IgM ELISA	Indirect ELISA	IgM for SARS-CoV-2 Spike protein	0.967	0.988	InBios	https://inbios.com	~2.5 h
COVID-SeroKlir, Kantaro Semi-Quantitative SARS-CoV-2 IgG Antibody Kit	Semi-quantitative 2-step ELISA	IgG for SARS-CoV-2 Spike protein	0.991	0.996	Kantaro Biosciences, LLC	https://kantarobio.com	~4 h
Mt. Sinai Laboratory COVID-19 ELISA Antibody Test	2-step ELISA	IgG for SARS-CoV-2 Spike protein	0.925	1	Mount Sinai Hospital Clinical Laboratory	https://www.mountsinai.org/about/covid19/antibody-test	N/A
Simoa Semi-Quantitative SARS-CoV-2 IgG Antibody Test	Semi-quantitative paramagnetic microbead-based sandwich ELISA	IgG for SARS-CoV-2 Spike protein	1	0.992	Quanterix Corporation	https://www.quanterix.com	~2 h and 45 min
Dimension EXL SARS-CoV-2 Total antibody assay (CV2T)	High throughput ELISA	Total antibodies for SARS-CoV-2 Spike protein	1	0.999	Siemens Healthcare Diagnostics	https://www.siemens-healthineers.com	~16 min
Dimension Vista SARS-CoV-2 Total antibody assay (COV2T)	High throughput ELISA	Total antibodies for SARS-CoV-2 Spike protein	1	0.998	Siemens Healthcare Diagnostics	https://www.siemens-healthineers.com	~16 min
OmniPATH COVID-19 Total Antibody ELISA Test	Sandwich ELISA	Total antibodies for SARS-CoV-2 Spike protein	0.967	0.975	Thermo Fisher Scientific	https://www.thermofisher.com	~1.5 h
COVID-19 ELISA pan-Ig Antibody Test	2-step ELISA	pan-Ig for SARS-CoV-2 Spike protein	0.975	0.991	University of Arizona Genetics Core for Clinical Services	http://uagcclinical.arizona.edu	N/A
ZEUS ELISA SARS-CoV-2 IgG Test System	Indirect ELISA	IgG for SARS-CoV-2 Spike and nucleocapsid proteins	0.933	1	ZEUS Scientific, Inc.	https://www.zeusscientific.com	~1.5 h
